# Supplementary material for: Crystallographically Mapped Ligand Binding Differs in High and Low IgE Binding Isoforms of Birch Pollen Allergen Bet v 1
Source: PubMed Central journal article supplement — J Mol Biol. 2012 Sep 7;422(1):109–23. doi: 10.1016/j.jmb.2012.05.016 (PMC3422537; doi:10.1016/j.jmb.2012.05.016), 2012-09-07
Supplement: mmc1.pdf [file mmc1.pdf]

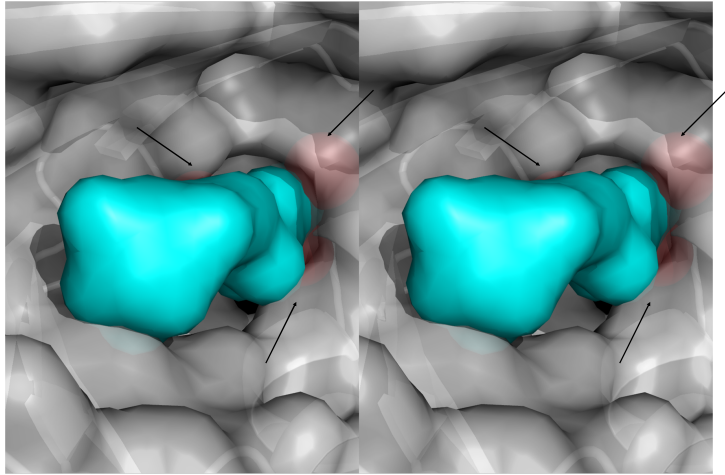

Supplement Figure 1: Sequence alignment of Bet v 1 isoforms described as high IgE binding (A, E and J) and low IgE binding (G, L and D) (Ferreira et al,1996). Aromatic residues are indicated by orange background. Residues discriminating these two Bet v 1 classes are encircled in red.

Supplement Figure 2: Brassinolide (BRA) modeled into the hydrophobic pocket of Bet v 1a. The steroid backbone was aligned according to deoxycholate. Despite some degrees of freedom, docking of BRA to Bet v 1a will always result in clashes as indicated in red (arrows).
